# Supplementary material
Source: MDPI journal article supplement (https://www.mdpi.com/2673-4079/4/4/23)
Supplement: s1 [file s1]

# Supplementary Materials

*for*

## **Saccharide-derived Zinc Oxide Nanoparticles with High Photocatalytic Activity for Water Decontamination and Sanitation**

**Kazi Afroza Sultana <sup>1</sup>, Javier Hernandez Ortega <sup>1</sup>, Mohammad Tariqul Islam <sup>1</sup>,  
Zayra N. Dorado <sup>2</sup>, Bonifacio Alvarado-Tenorio <sup>3,4</sup>, Ignacio Rene Galindo-Esquivel <sup>4</sup>  
and Juan C. Noveron <sup>1,\*</sup>**

<sup>1</sup> Department of Chemistry and Biochemistry, The University of Texas at El Paso, 500 West University Avenue, El Paso, TX 79902, USA

<sup>2</sup> Department of Metallurgical & Materials Engineering, The University of Texas at El Paso, 500 West University Avenue, El Paso, TX 79902, USA

<sup>3</sup> Instituto de Ciencias Biomédicas, Universidad Autónoma de Ciudad Juárez, Chihuahua 32310, Mexico

<sup>4</sup> División de Ciencias Naturales y Exactas, Universidad de Guanajuato, Noria Alta s/n, Guanajuato 36040, Mexico

\* Correspondence: jcnoveron@utep.edu

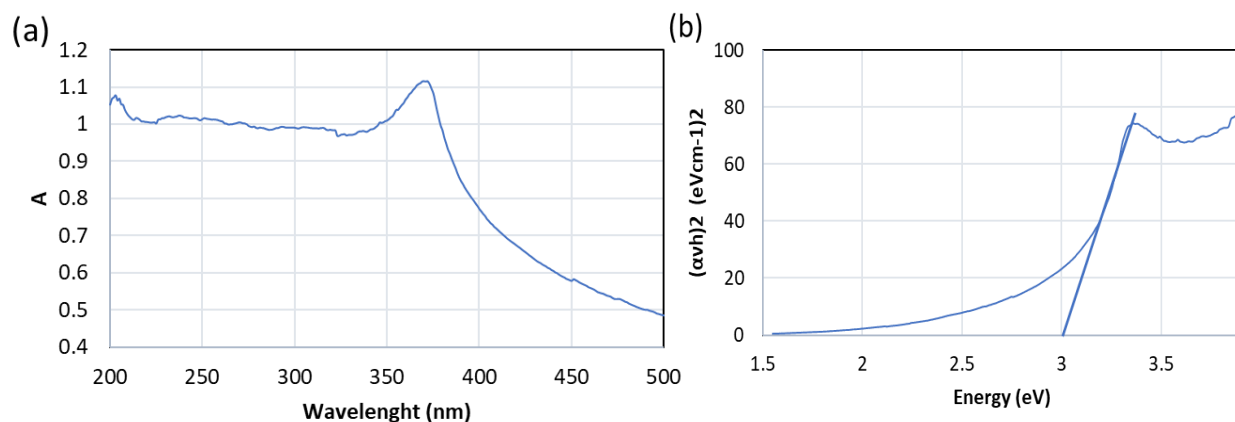

Figure S1: (a) The UV-visible absorption spectrum of Dextrin-ZnO NPs suspension in ethanol, (b) Tauc plot for the determination of bandgap of ZnO NPs.

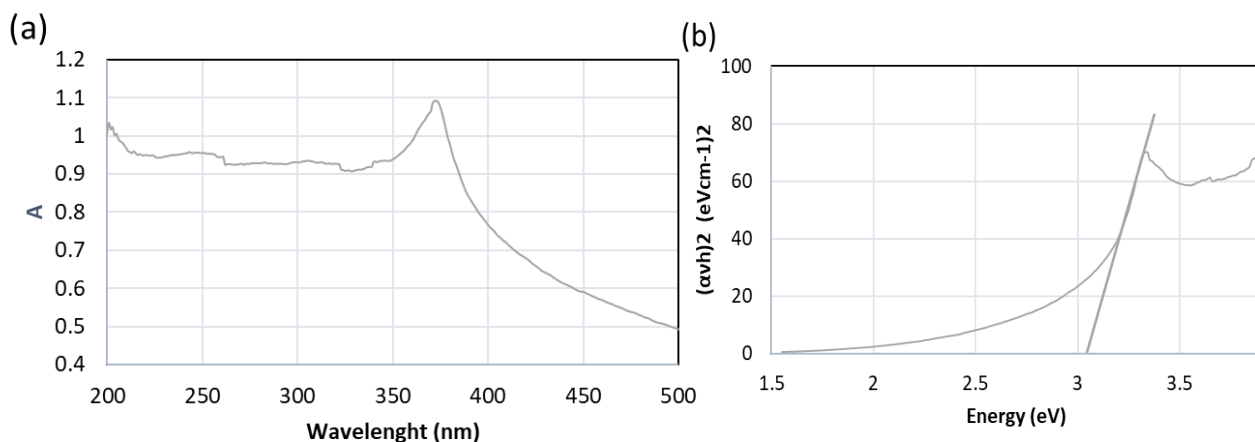

Figure S2: (a) The UV-visible absorption spectrum of Glucose-ZnO NPs suspension in ethanol, (b) Tauc plot for the determination of bandgap of ZnO NPs.

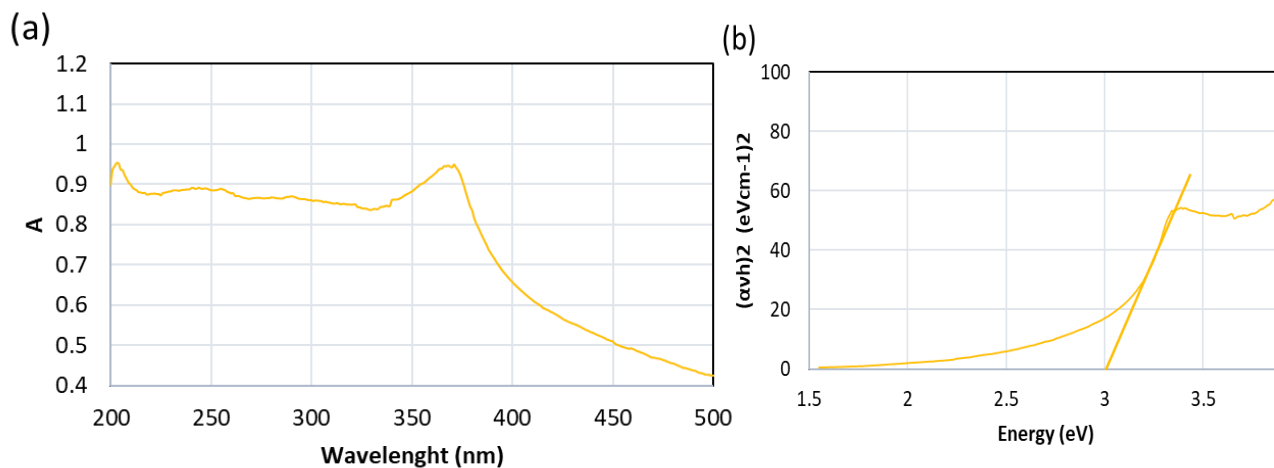

Figure S3: (a) The UV-visible absorption spectrum of Starch-ZnO NPs suspension in ethanol, (b) Tauc plot for the determination of bandgap of ZnO NPs.

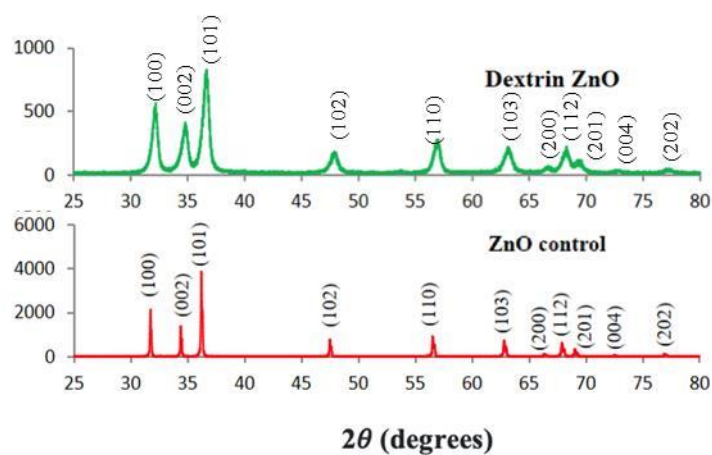

Figure S4: XRPD Patterns of the Dextrin ZnO NP and ZnO control.

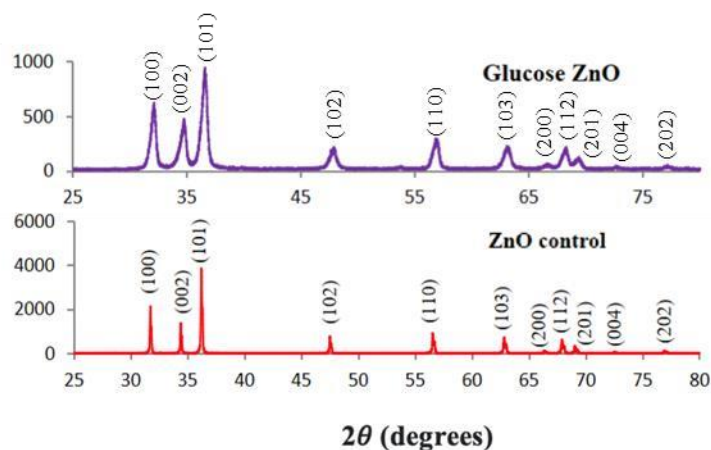

Figure S5: XRPD Patterns of the Glucose ZnO NP and ZnO control.

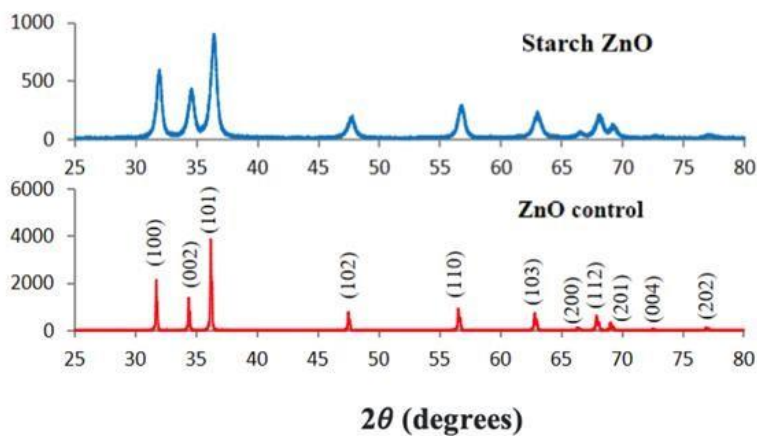

Figure S6: XRPD Patterns of the Starch ZnO NP and ZnO control.

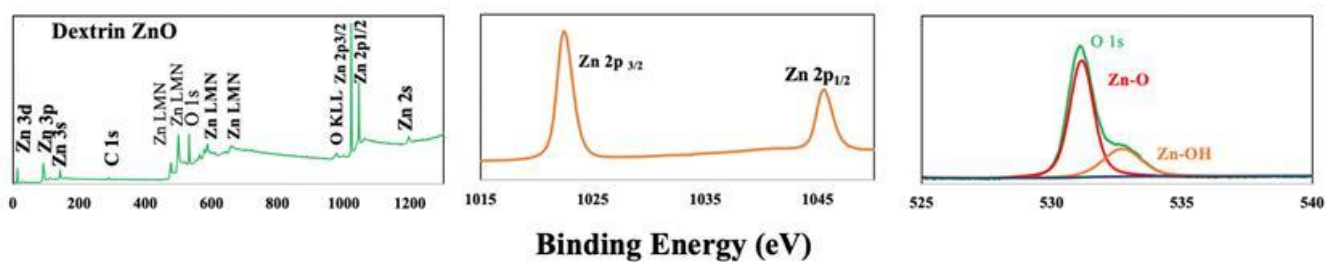

Figure S7: (a) XPS survey spectrum of Dextrin ZnO, (b) XPS spectrum of Zn 2p, (c) XPS spectrum of O 1s.

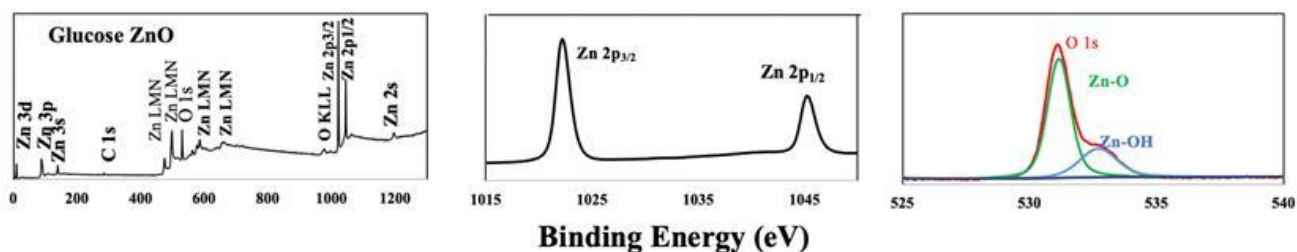

Figure S8: (a) XPS survey spectrum of Glucose ZnO, (b) XPS spectrum of Zn 2p, (c) XPS spectrum of O 1s.

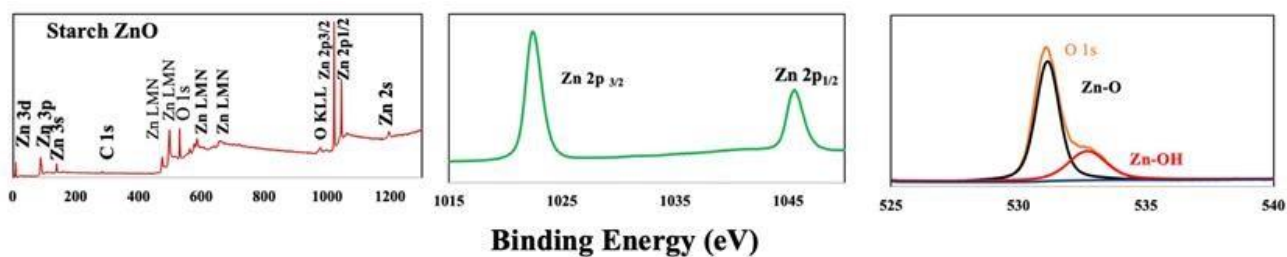

Figure S9: (a) XPS survey spectrum of Starch ZnO, (b) XPS spectrum of Zn 2p, (c) XPS spectrum of O 1s.
